# Supplementary material for: Structure of the mouse TRPC4 ion channel
Source: bioRxiv or medRxiv preprint supplement (doi:10.1101/282715), 2018-03-15

# ED Figure 1.

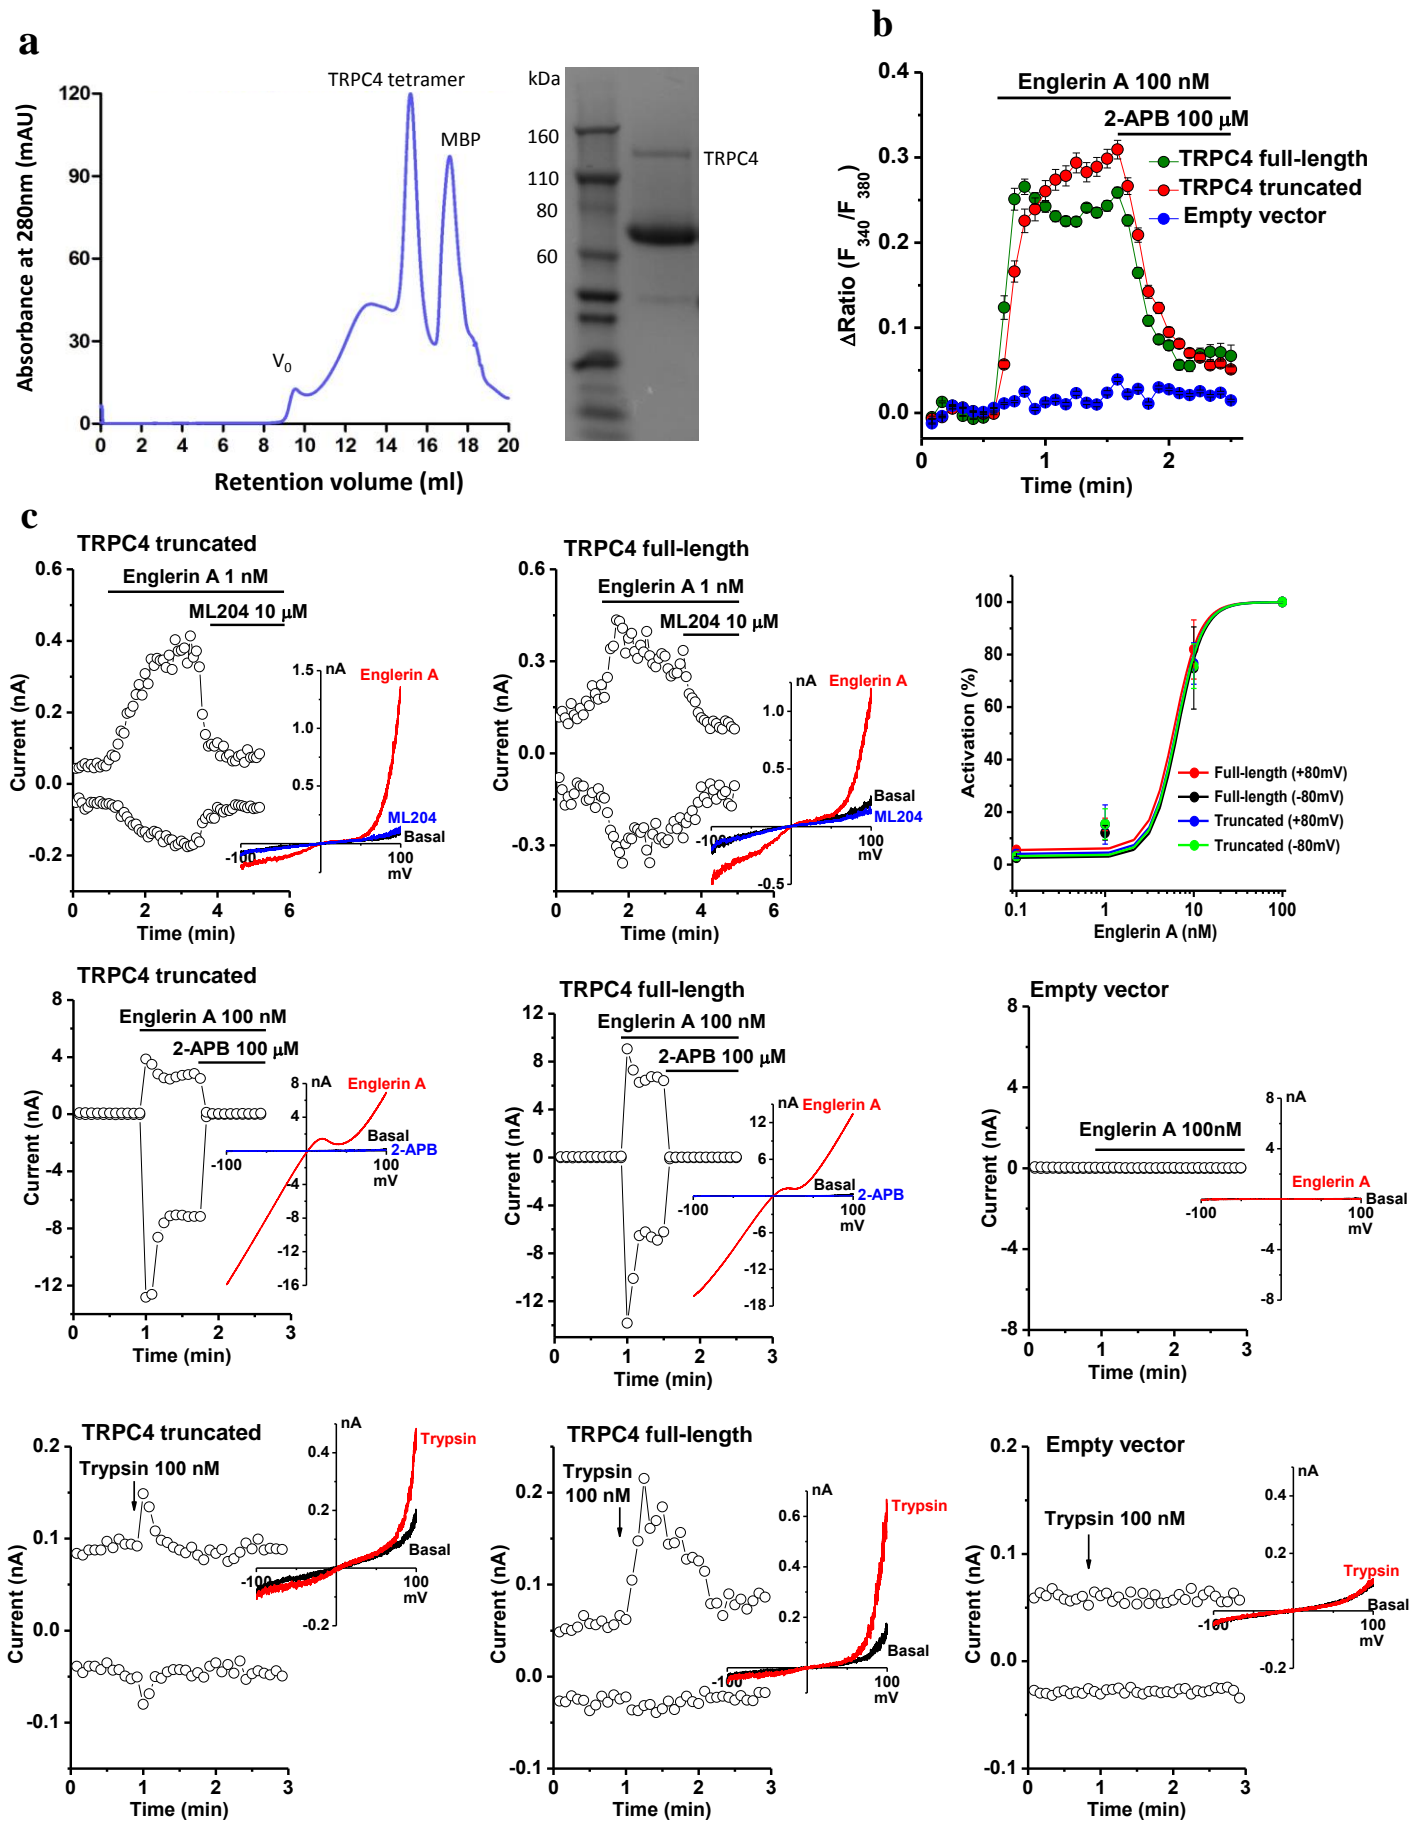

**ED Figure 2.****a**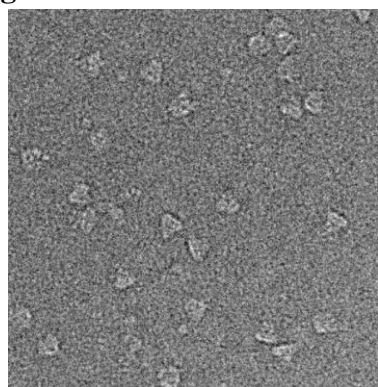

6,661 movies from two datasets,  
total 381,165 particles picked

Tree 2D classification, 31,738  
particles eliminated

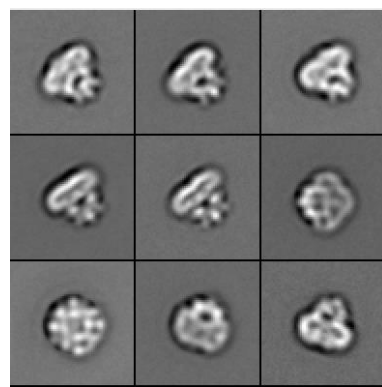

349,427 particles subject  
to Relion 3D classification

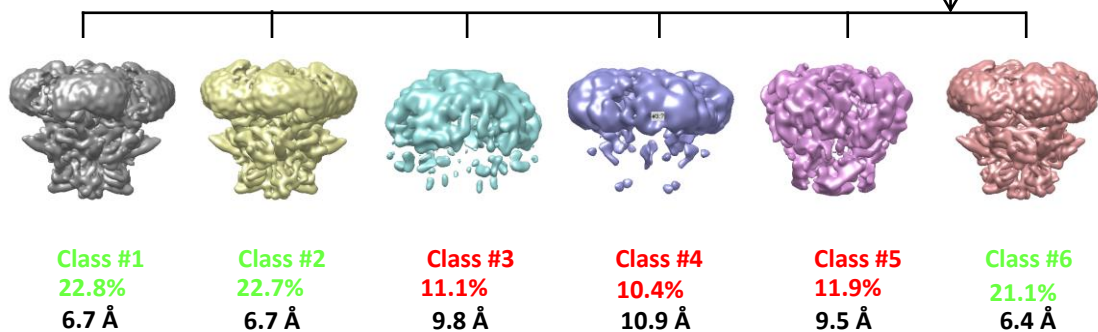

Relion 3D  
refinement

232,858 "best" particles from Classes 1, 2 & 6

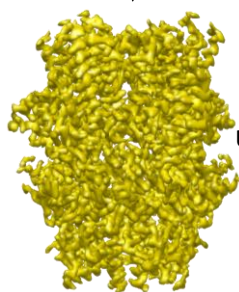

3.42 Å

Use sub-frame 1-14

Relion 3D  
refinement

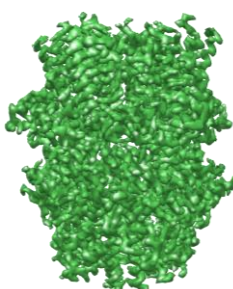

3.28 Å

Model building

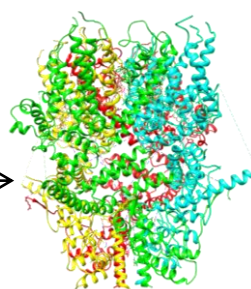

Atomic model

**b**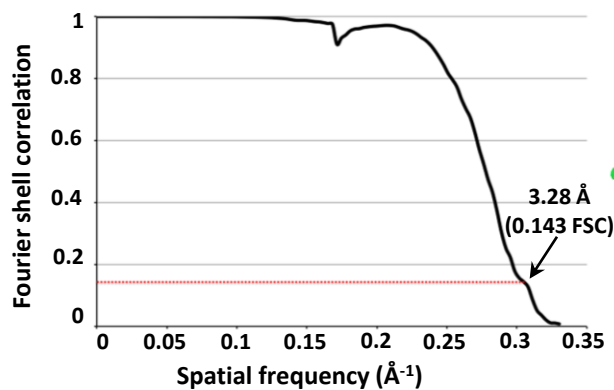**c**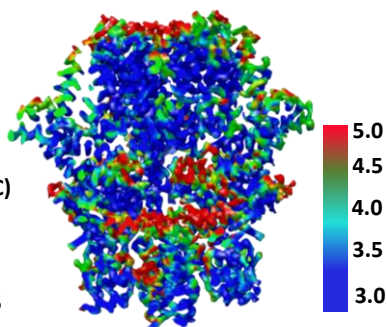**d**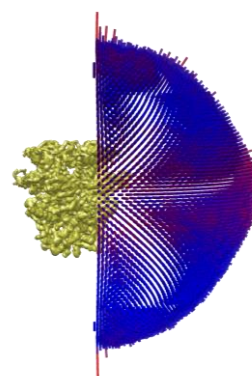

# ED Figure 3.

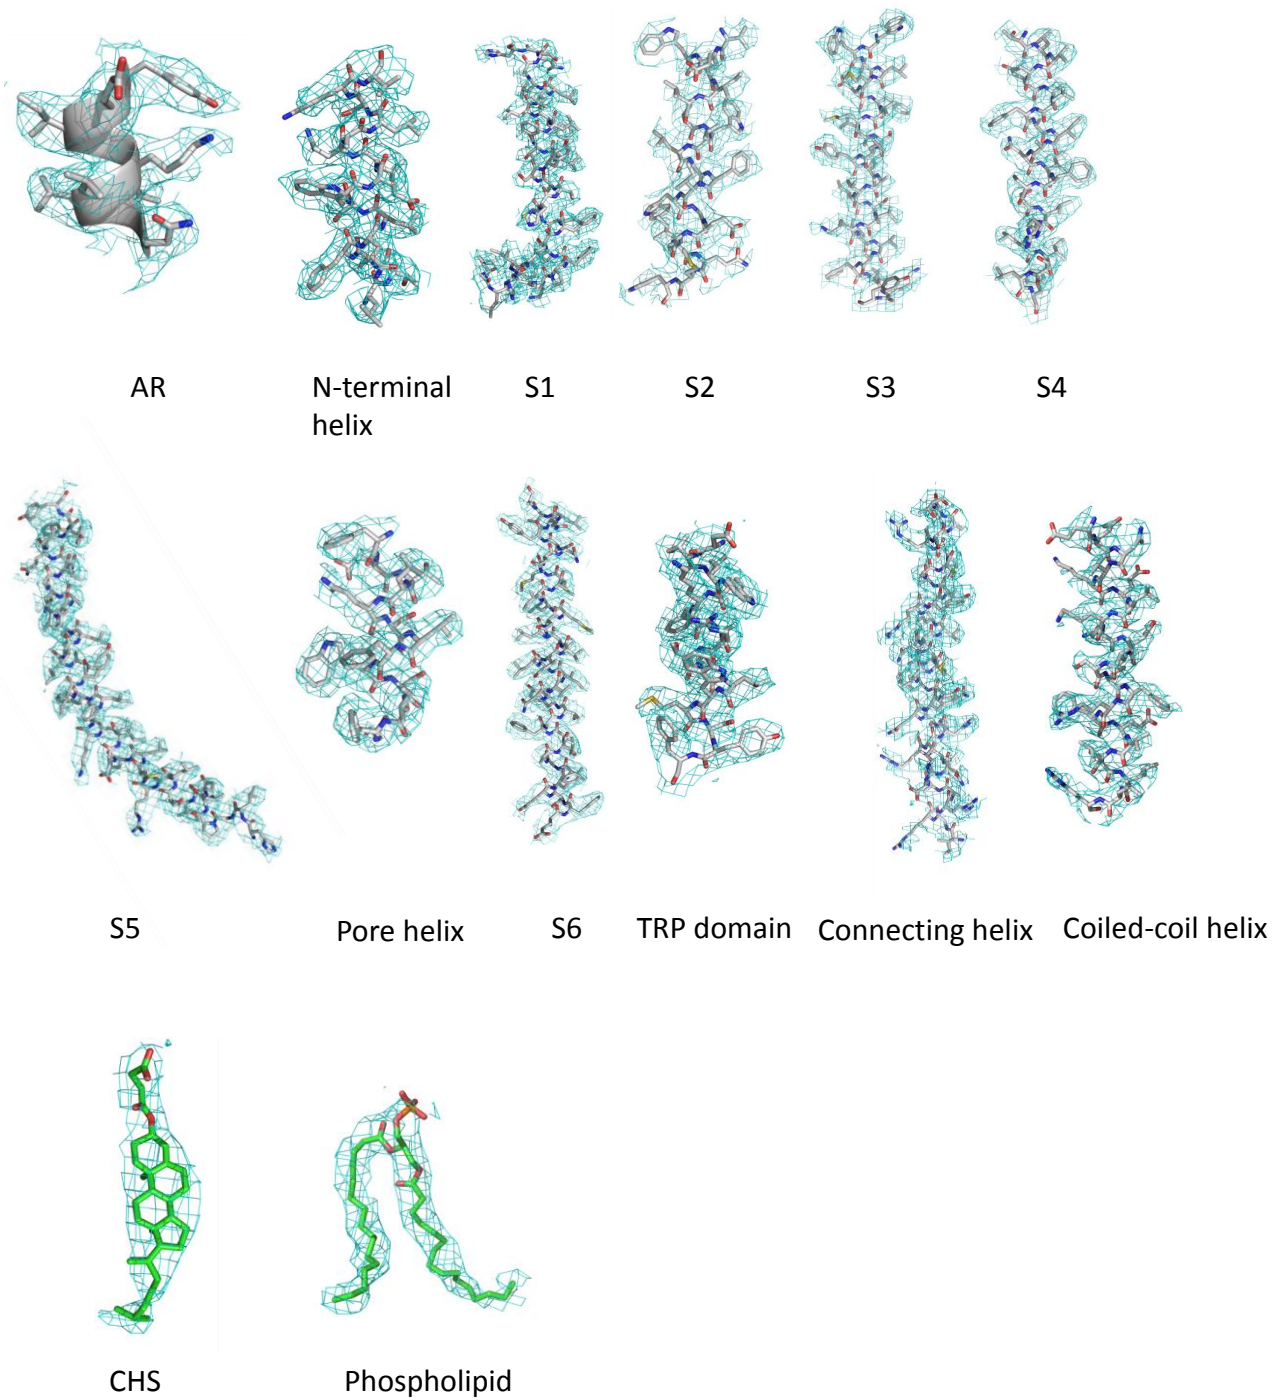

**ED Figure 4.**

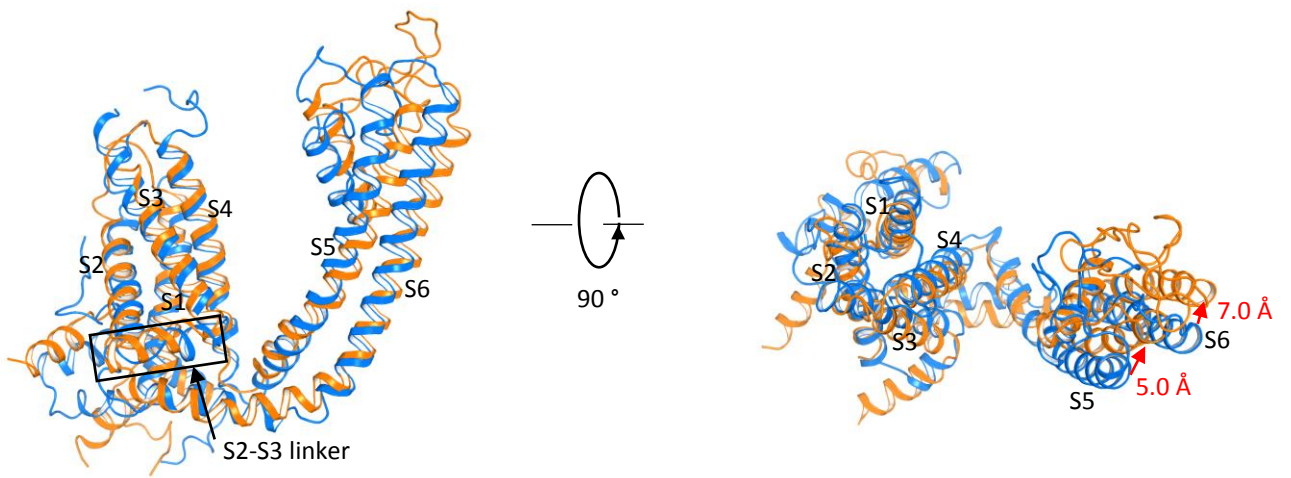

# ED Figure 5.

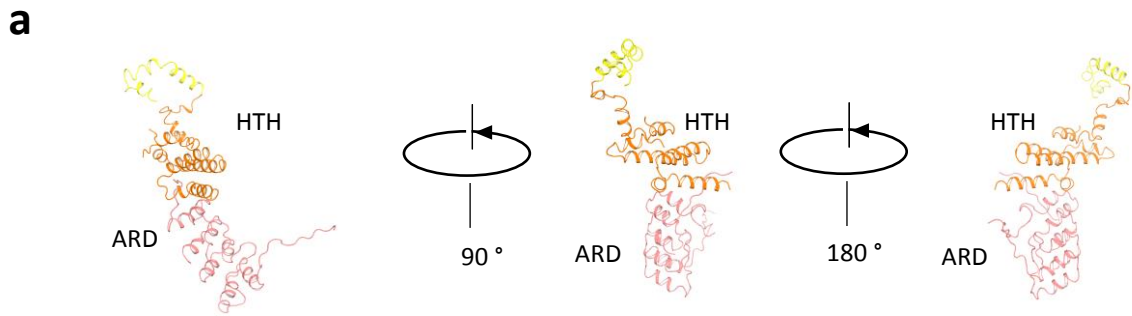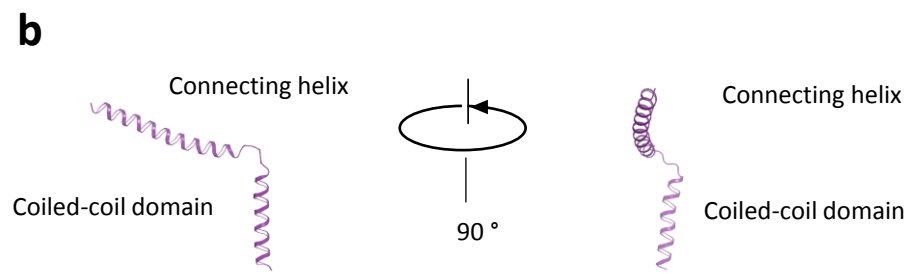

# ED Figure 6.

**a**

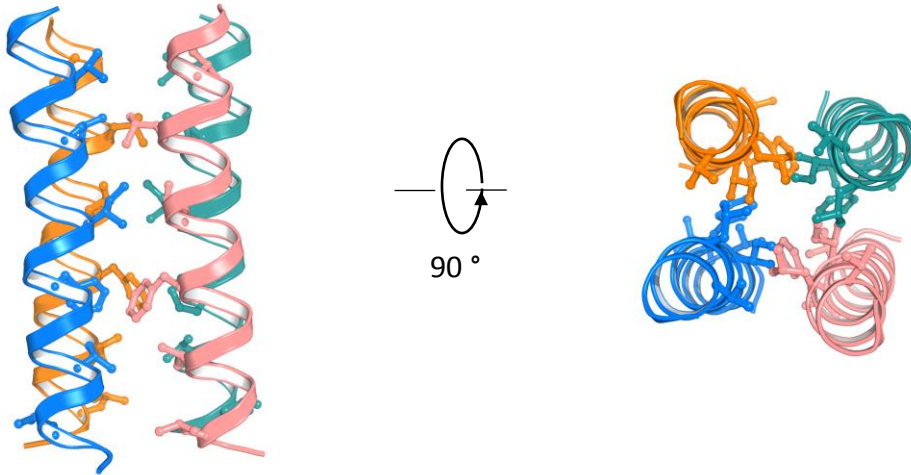

**b**

735 755  
g a b c d e f g a b c d e f g a b c d e f  
TRPC4 (mouse): T E E N **V** K E **L** K Q D I S S **F** R F E **V** L G **L** L R  
TRPC5 (mouse): T E E N **F** K E **L** K Q D I S S **F** R Y E **V** L D **L** L G

**ED Figure 7.**

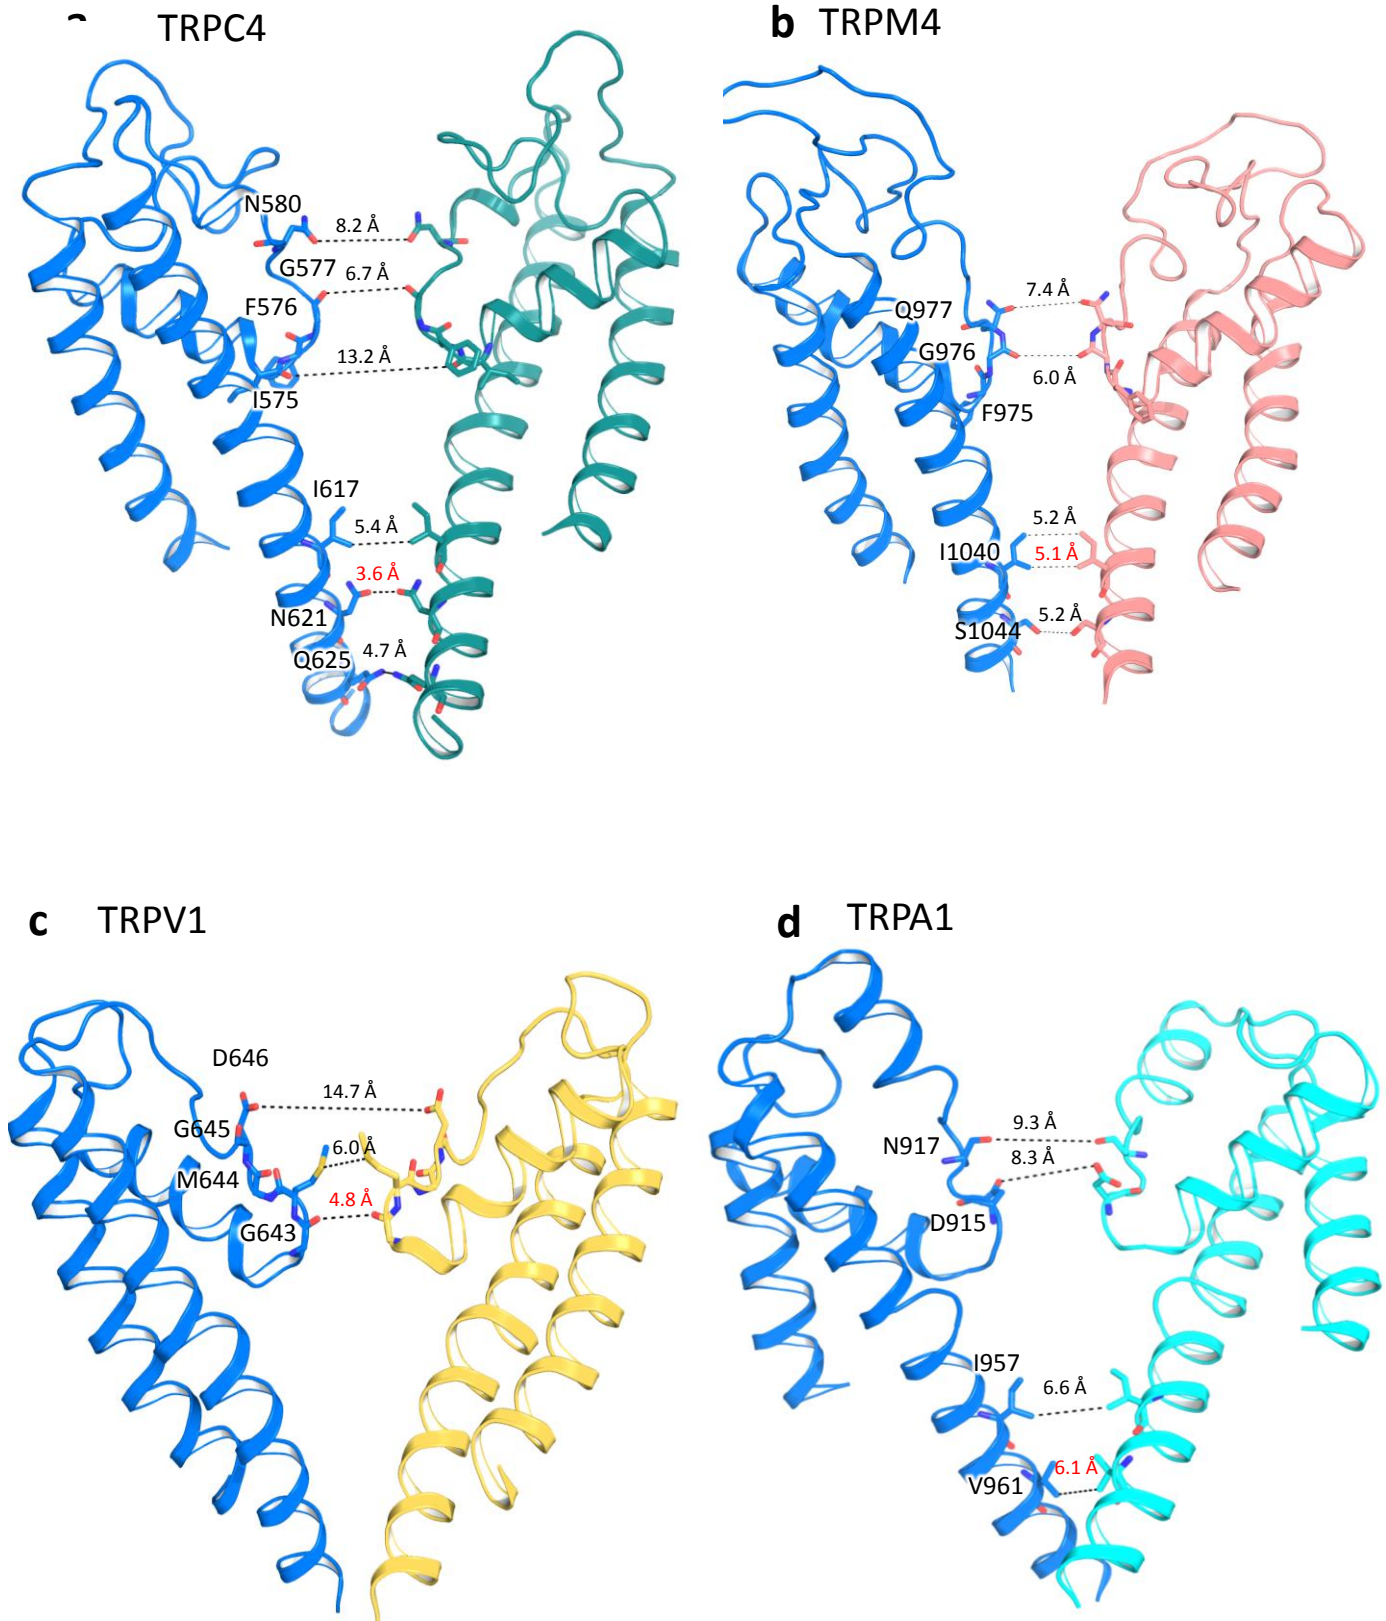





# ED Figure 9.

**a**

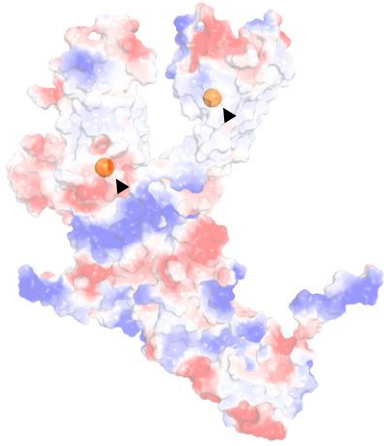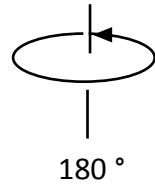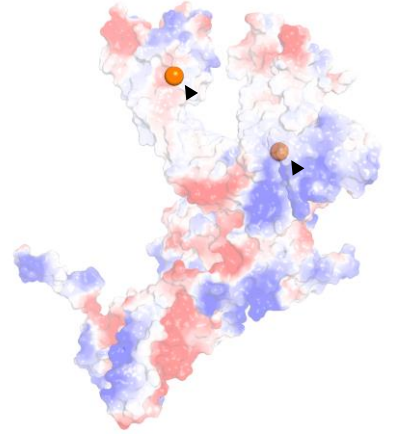

**b**

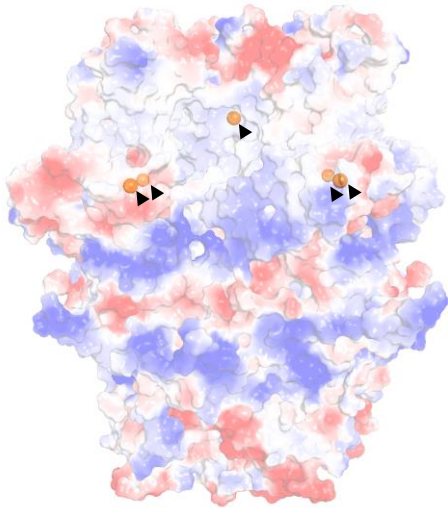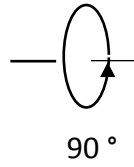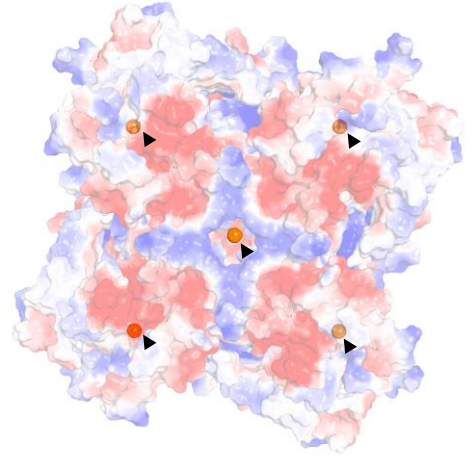

**ED Figure 10.**

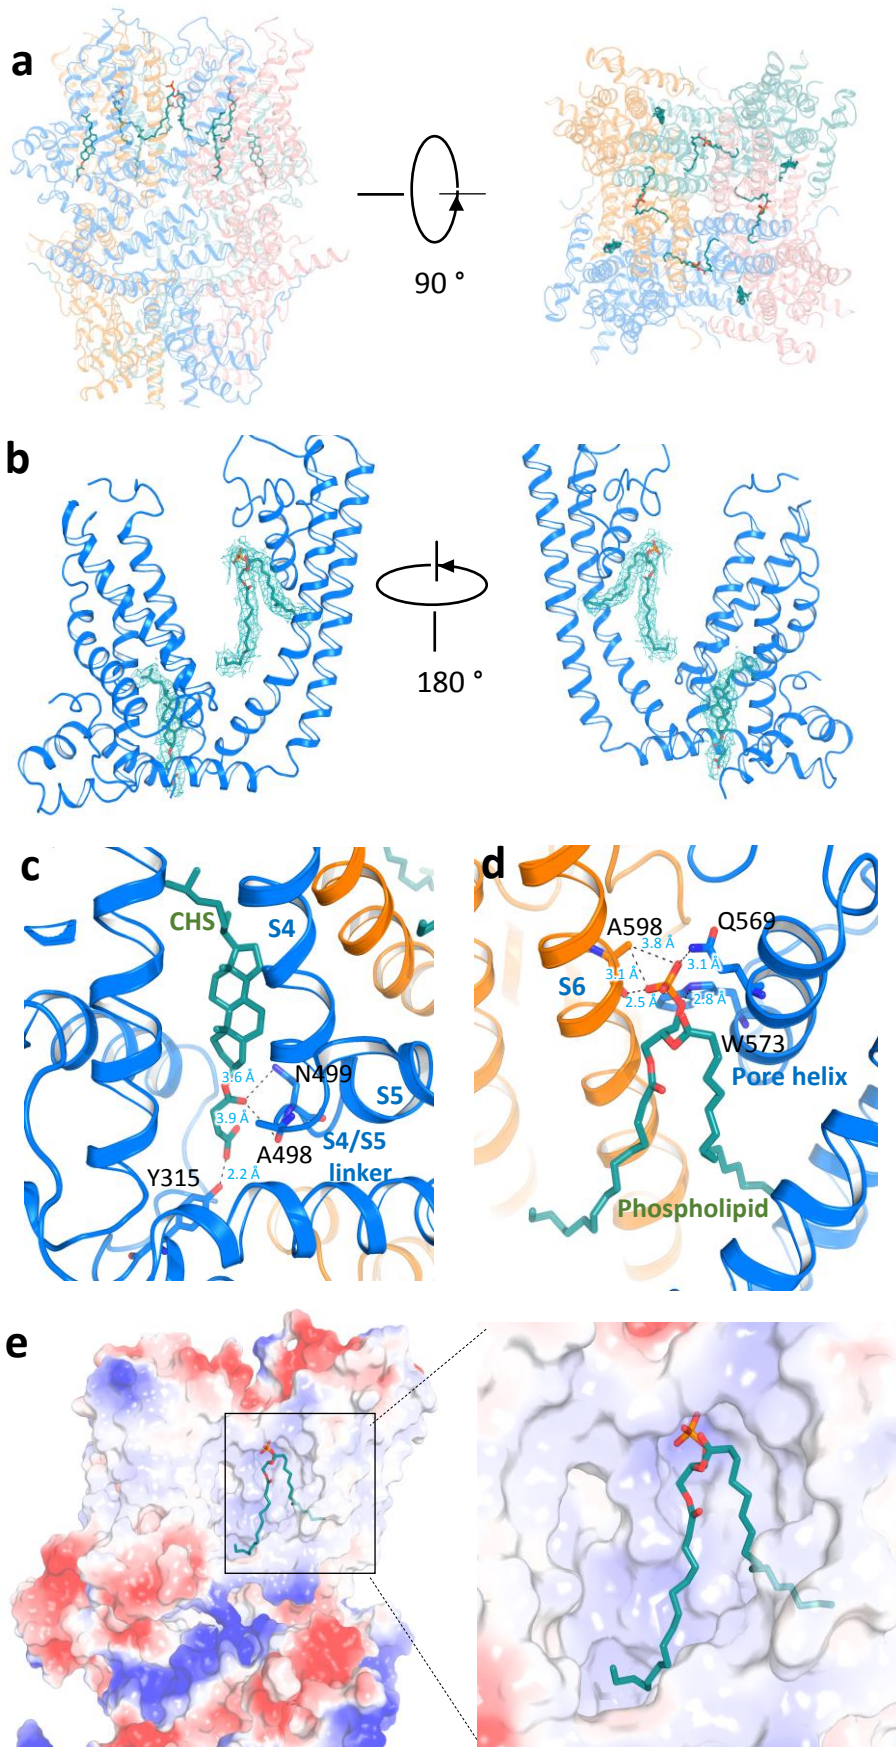

Supplement: Supplementary file [file 282715-1.pdf]
