# Supplementary material for: Structure of the mouse TRPC4 ion channel
Source: bioRxiv or medRxiv preprint supplement (doi:10.1101/282715), 2018-03-15
Supplement: Supplementary file [file 282715-2.pdf]

**Table S1.** Cryo-EM data collection, refinement and validation statistics

|                                        | MouseTRPC4<br>(EMD-6901) (PDB 5Z96) |
|----------------------------------------|-------------------------------------|
| <b>Data collection and processing</b>  |                                     |
| Magnification                          | 40,607                              |
| Voltage (kV)                           | 300                                 |
| Electron exposure (e-/Å <sup>2</sup> ) | 52.8                                |
| Defocus range (µm)                     | 1.5-3.0                             |
| Pixel size (Å)                         | 1.23                                |
| Symmetry imposed                       | <i>C</i> <sub>4</sub>               |
| Initial particle images (no.)          | 381,165                             |
| Final particle images (no.)            | 232,858                             |
| Map resolution (Å)                     | 3.3                                 |
| <b>Refinement</b>                      |                                     |
| Initial model used (PDB code)          | <i>de novo</i>                      |
| Model resolution (Å)                   | 3.3                                 |
| Model composition                      |                                     |
| Non-hydrogen atoms                     | 21,506                              |
| Protein residues                       | 2,608                               |
| Ligands                                | 13                                  |
| R.m.s. deviations                      |                                     |
| Bond lengths (Å)                       | 0.01                                |
| Bond angles (°)                        | 1.11                                |
| Validation                             |                                     |
| MolProbity score                       | 1.83                                |
| Ramachandran plot                      |                                     |
| Favored (%)                            | 97.39                               |
| Allowed (%)                            | 2.08                                |
| Disallowed (%)                         | 0.53                                |
